# Supplementary material for: Spatial Analysis of Determinants of COVID-19 Vaccine Hesitancy in Portugal
Source: MDPI journal article supplement (doi:10.3390/vaccines12020119), 2024-01-24
Supplement: s1 [file s1]

# Supplementary material: Spatial analysis of determinants of COVID-19 vaccine hesitancy in Portugal

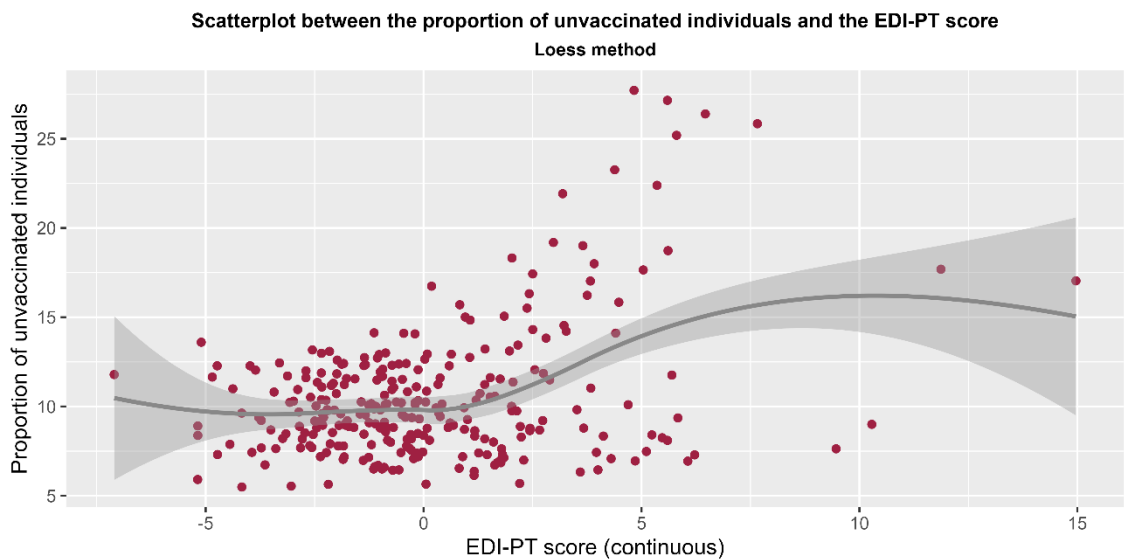

Figure S1. Scatterplot between the proportion of unvaccinated individuals and the EDI-PT score (each dot represents a municipality).

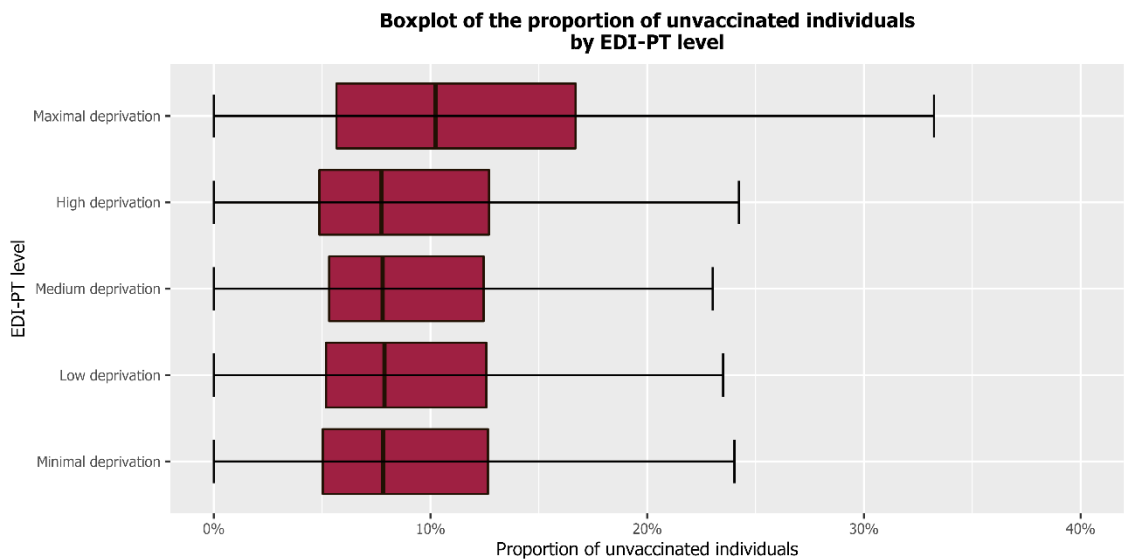

Figure S2. Boxplot of the proportion of unvaccinated individuals by EDI-PT level.

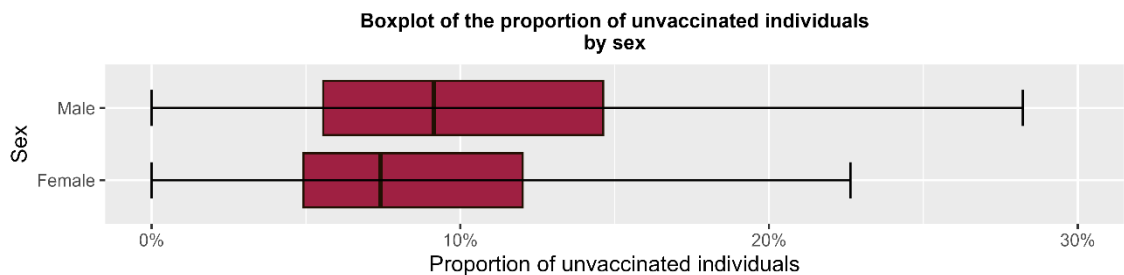

Figure S3. Boxplot of the proportion of unvaccinated individuals by sex.

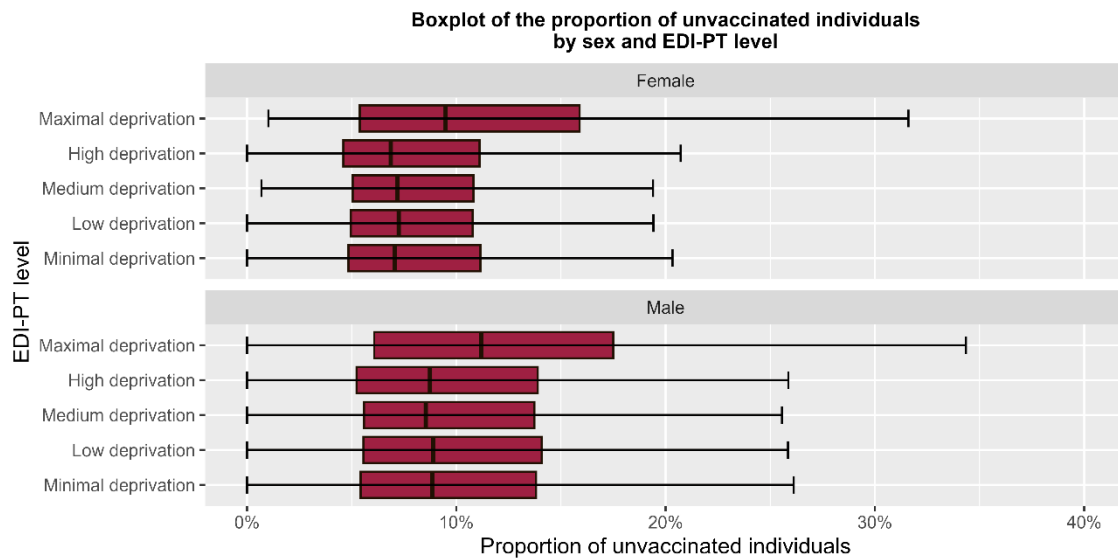

*Figure S4. Boxplot of the proportion of unvaccinated individuals by sex and EDI-PT level.*

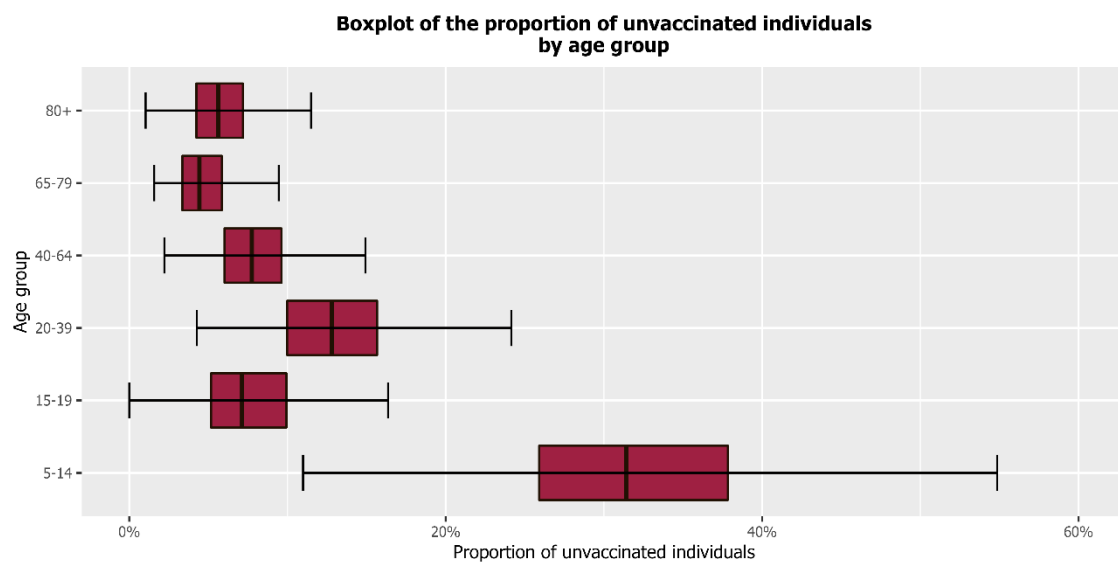

*Figure S5. Boxplot of the proportion of unvaccinated individuals by age group.*

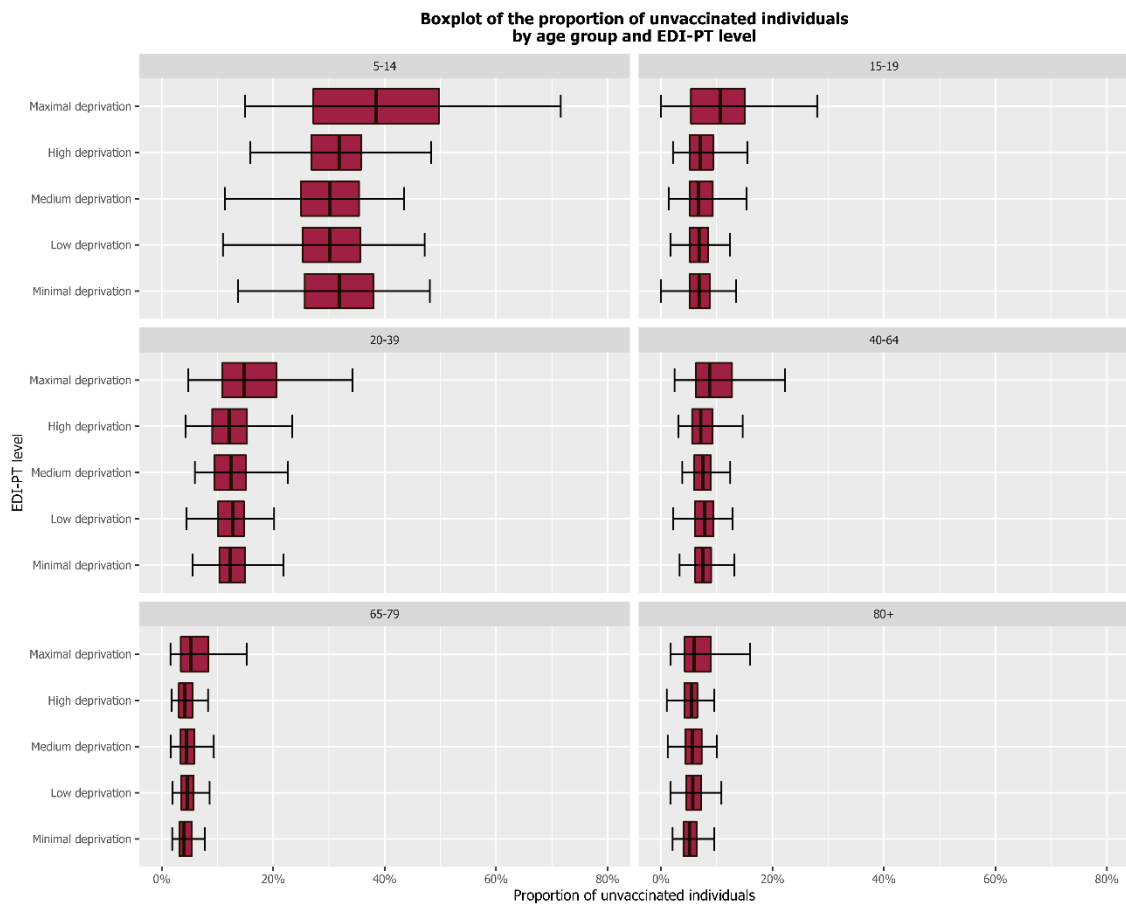

*Figure S6. Boxplot of the proportion of unvaccinated individuals by age group and EDI-PT level.*

**Proportion of individuals unvaccinated for COVID-19  
by municipality | March 31st 2022**

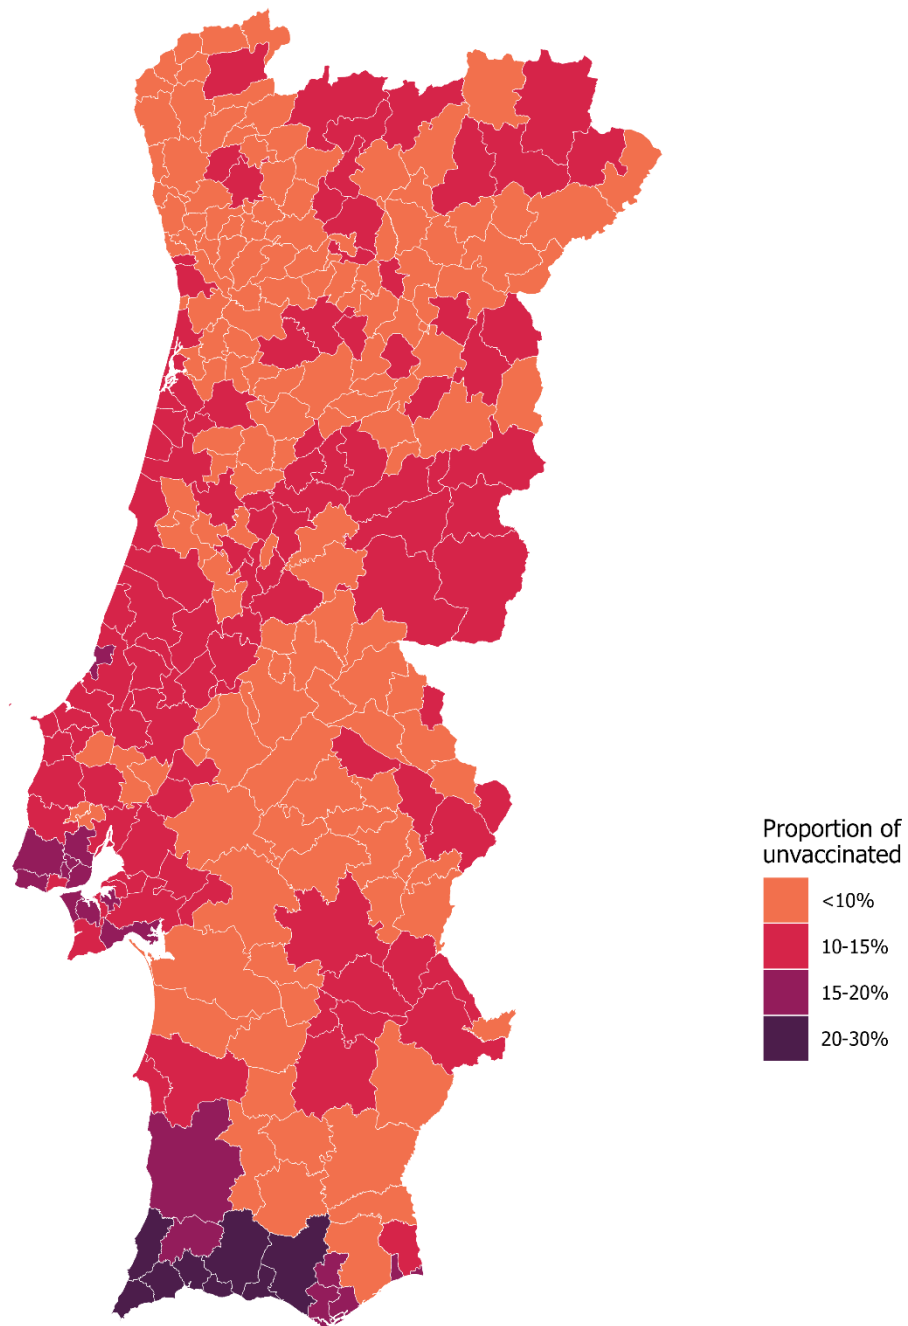

*Figure S7. Map of the distribution of the proportion of unvaccinated individuals by municipality.*

**Social Deprivation Level (EDI-PT quintiles)  
by municipality | 2020**

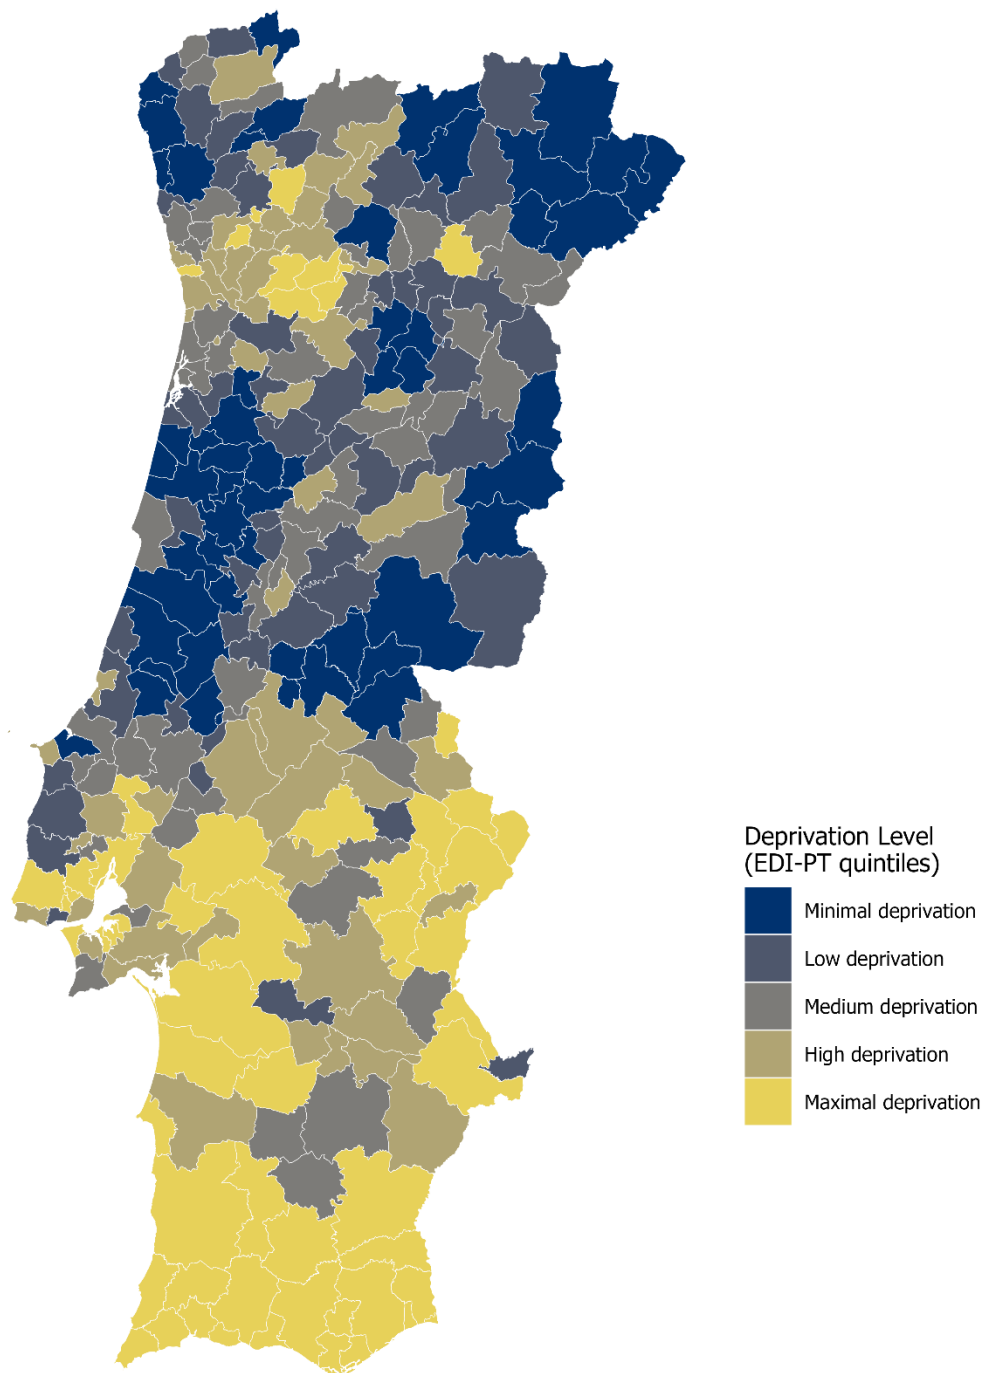

*Figure S8. Map of the distribution of the social deprivation levels (EDI-PT quintiles) by municipality.*

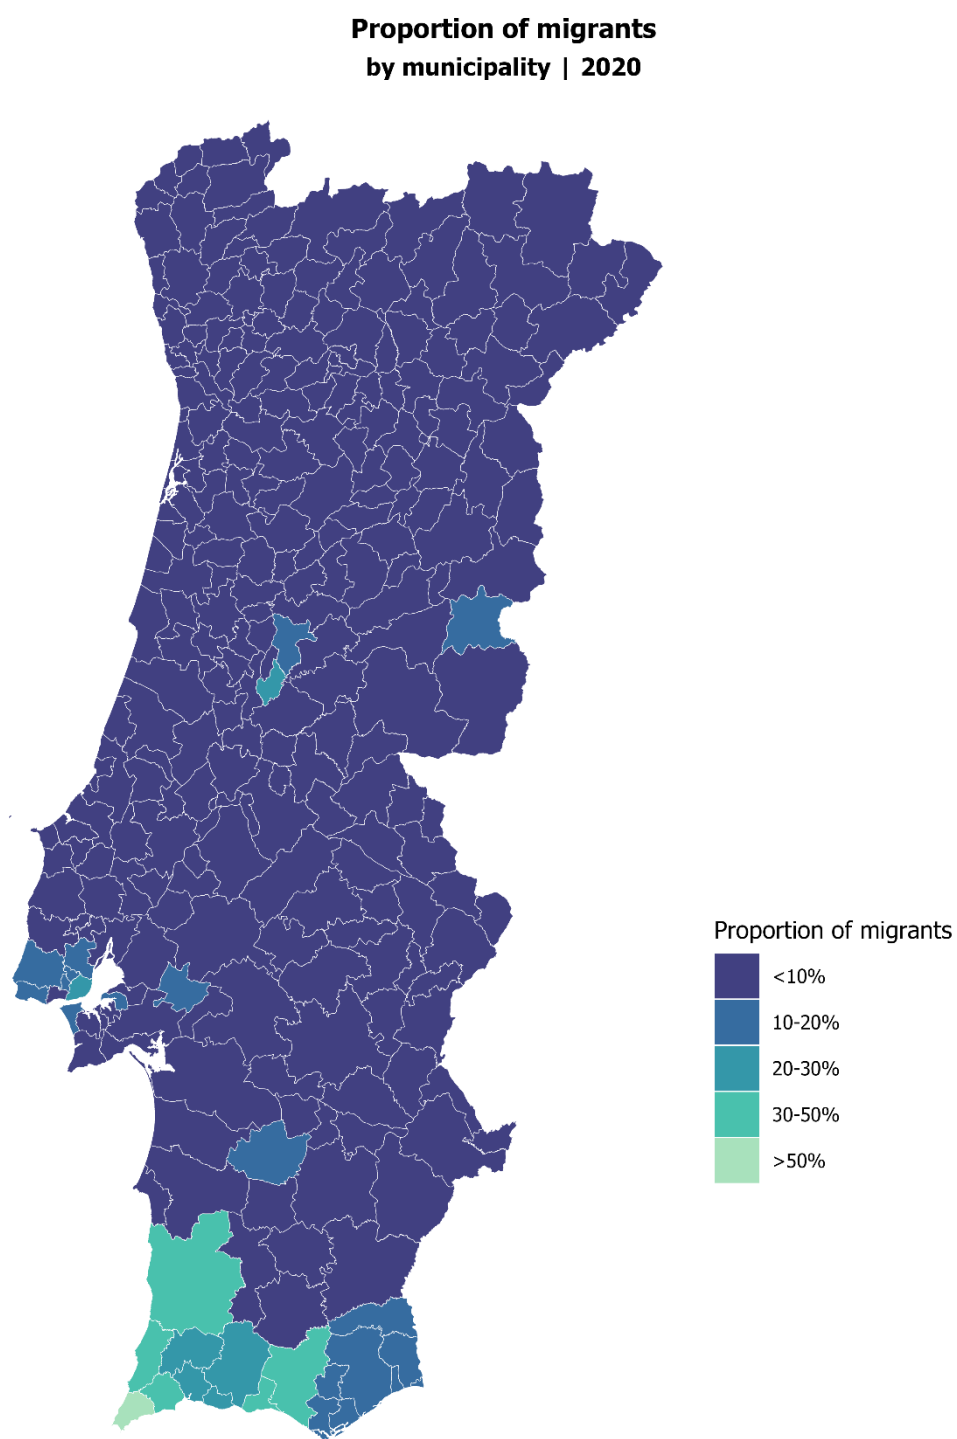

*Figure S9. Map of the distribution of the proportion of migrants by municipality.*

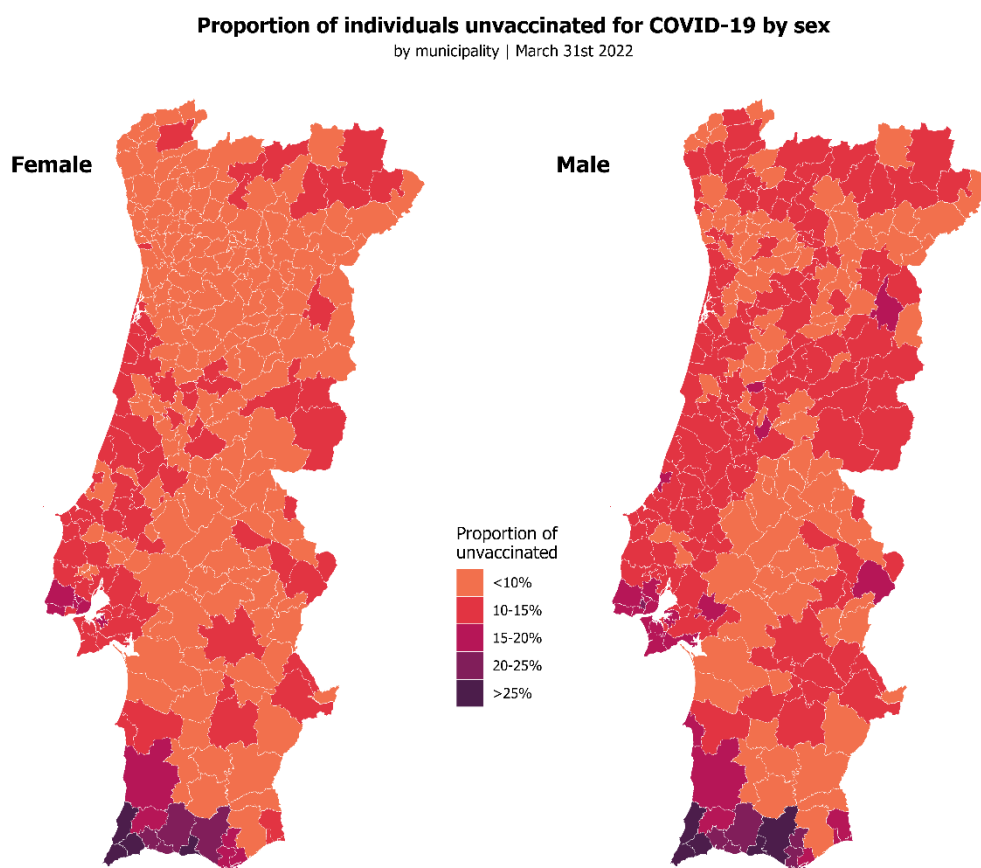

*Figure S10. Map of the distribution of the proportion of unvaccinated individuals by sex and municipality.*

## Proportion of individuals unvaccinated for COVID-19 by age group

by municipality | March 31st 2022

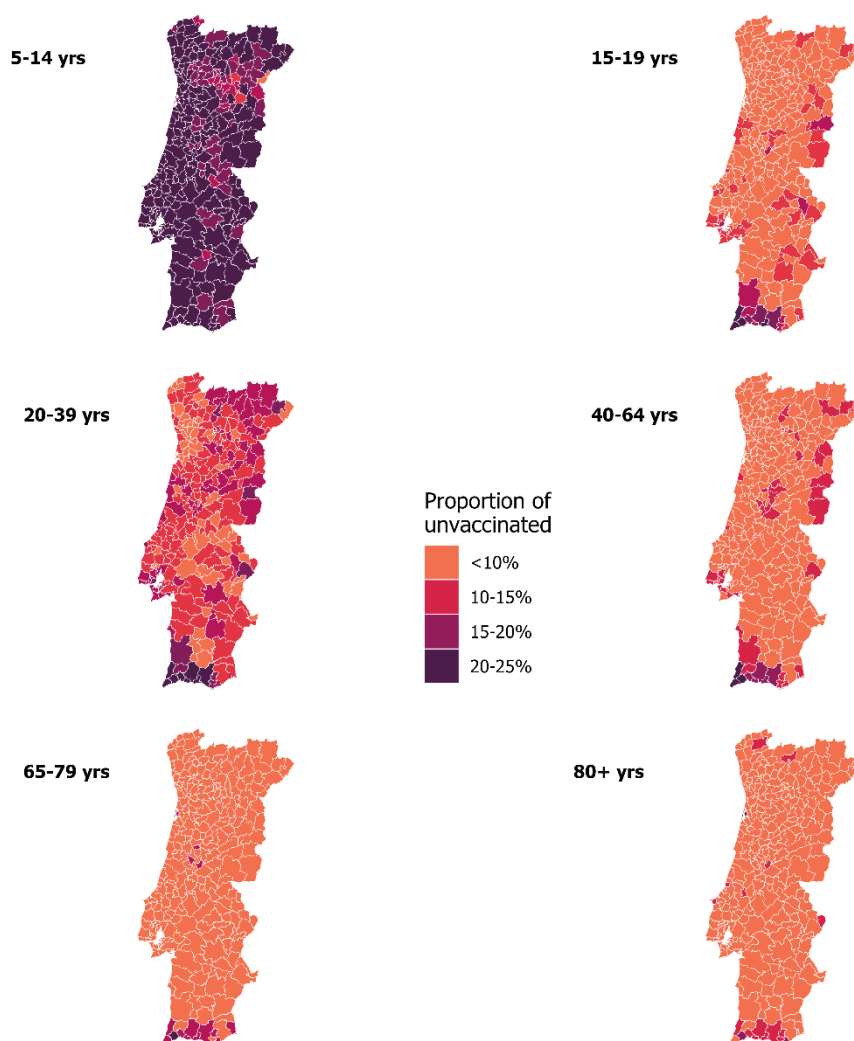

Figure S11. Map of the distribution of the proportion of unvaccinated individuals by age group and municipality.



**Table S1. Results from the univariate model with the EDI-PT score.**

|                     | Mean   | SD    | 0.025 quantile | 0.5 quantile | 0.975 quantile |
|---------------------|--------|-------|----------------|--------------|----------------|
| <b>Intercept</b>    | -0.153 | 0.046 | -0.163         | -0.153       | -0.144         |
| <b>EDI-PT score</b> | 0.005  | 0.006 | -0.007         | 0.005        | 0.017          |

**Table S2. Results from the univariate model with the EDI-PT quintiles.**

|                          | Mean   | SD    | 0.025 quantile | 0.5 quantile | 0.975 quantile |
|--------------------------|--------|-------|----------------|--------------|----------------|
| <b>Intercept</b>         | -0.205 | 0.030 | -0.263         | -0.205       | -0.147         |
| <b>EDI-PT quintile 2</b> | 0.011  | 0.036 | -0.060         | 0.011        | 0.081          |
| <b>EDI-PT quintile 3</b> | 0.067  | 0.040 | -0.011         | 0.067        | 0.146          |
| <b>EDI-PT quintile 4</b> | 0.093  | 0.044 | 0.006          | 0.093        | 0.180          |
| <b>EDI-PT quintile 5</b> | 0.085  | 0.051 | -0.016         | 0.085        | 0.185          |

**Table S3. Results from the univariate model with the sex (proportion of women).**

|                    | Mean   | SD    | 0.025 quantile | 0.5 quantile | 0.975 quantile |
|--------------------|--------|-------|----------------|--------------|----------------|
| <b>Intercept</b>   | -1.385 | 0.734 | -2.827         | -1.384       | 0.055          |
| <b>Prop. women</b> | 0.024  | 0.014 | -0.004         | 0.024        | 0.051          |

**Table S4. Results from the univariate model with the 5-14 years age group.**

|                  | Mean   | SD    | 0.025 quantile | 0.5 quantile | 0.975 quantile |
|------------------|--------|-------|----------------|--------------|----------------|
| <b>Intercept</b> | -0.449 | 0.094 | -0.633         | -0.449       | -0.265         |
| <b>5-14 yrs</b>  | 0.036  | 0.011 | 0.014          | 0.036        | 0.058          |

**Table S5. Results from the univariate model with the 15-19 years age group.**

|                  | Mean   | SD    | 0.025 quantile | 0.5 quantile | 0.975 quantile |
|------------------|--------|-------|----------------|--------------|----------------|
| <b>Intercept</b> | -0.325 | 0.010 | -0.521         | -0.325       | -0.130         |
| <b>15-19 yrs</b> | 0.036  | 0.021 | -0.005         | 0.036        | 0.076          |

**Table S6. Results from the univariate model with the 20-39 years age group.**

|                  | <b>Mean</b> | <b>SD</b> | <b>0.025 quantile</b> | <b>0.5 quantile</b> | <b>0.975 quantile</b> |
|------------------|-------------|-----------|-----------------------|---------------------|-----------------------|
| <b>Intercept</b> | -0.638      | 0.115     | -0.863                | -0.638              | -0.412                |
| <b>20-39 yrs</b> | 0.023       | 0.005     | 0.012                 | 0.023               | 0.033                 |

**Table S7. Results from the univariate model with the 40-64 years age group.**

|                  | <b>Mean</b> | <b>SD</b> | <b>0.025 quantile</b> | <b>0.5 quantile</b> | <b>0.975 quantile</b> |
|------------------|-------------|-----------|-----------------------|---------------------|-----------------------|
| <b>Intercept</b> | 0.219       | 0.297     | -0.365                | 0.218               | 0.800                 |
| <b>40-64 yrs</b> | -0.010      | 0.008     | -0.026                | -0.010              | 0.006                 |

**Table S8. Results from the univariate model with the 65-79 years age group.**

|                  | <b>Mean</b> | <b>SD</b> | <b>0.025 quantile</b> | <b>0.5 quantile</b> | <b>0.975 quantile</b> |
|------------------|-------------|-----------|-----------------------|---------------------|-----------------------|
| <b>Intercept</b> | 0.048       | 0.099     | -0.147                | 0.048               | 0.242                 |
| <b>65-79 yrs</b> | -0.010      | 0.005     | -0.021                | -0.010              | 0.000                 |

**Table S9. Results from the univariate model with the 80 years or more age group.**

|                  | <b>Mean</b> | <b>SD</b> | <b>0.025 quantile</b> | <b>0.5 quantile</b> | <b>0.975 quantile</b> |
|------------------|-------------|-----------|-----------------------|---------------------|-----------------------|
| <b>Intercept</b> | 0.007       | 0.053     | -0.097                | 0.007               | 0.112                 |
| <b>80+ yrs</b>   | -0.017      | 0.006     | -0.028                | -0.017              | -0.006                |

**Table S10. Results from the univariate model with the proportion of migrants.**

|                       | <b>Mean</b> | <b>SD</b> | <b>0.025 quantile</b> | <b>0.5 quantile</b> | <b>0.975 quantile</b> |
|-----------------------|-------------|-----------|-----------------------|---------------------|-----------------------|
| <b>Intercept</b>      | -0.274      | 0.016     | -0.305                | -0.274              | -0.243                |
| <b>Prop. migrants</b> | 2.243       | 0.261     | 1.729                 | 2.244               | 2.753                 |

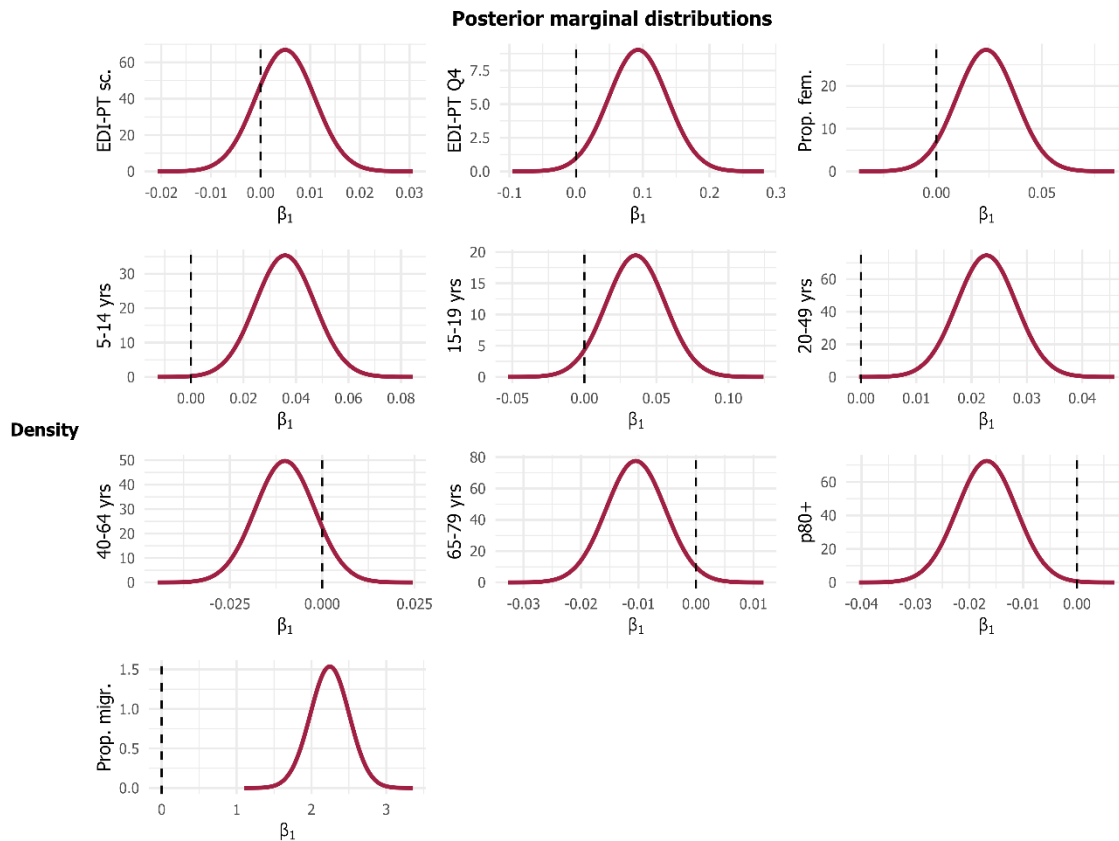

Figure S12. Plots showing the posterior marginal distributions of the univariate models.

### Collinearity tests between the EDI-PT and the proportion of migrants

Since the 2018 version of the EDI-PT included an item related to foreign residents, we ran collinearity tests between the EDI-PT variables (score and quintiles) and the proportion of migrants, to exclude the possibility of any interference.

#### Scatterplot between the EDI-PT score and the proportion of migrants

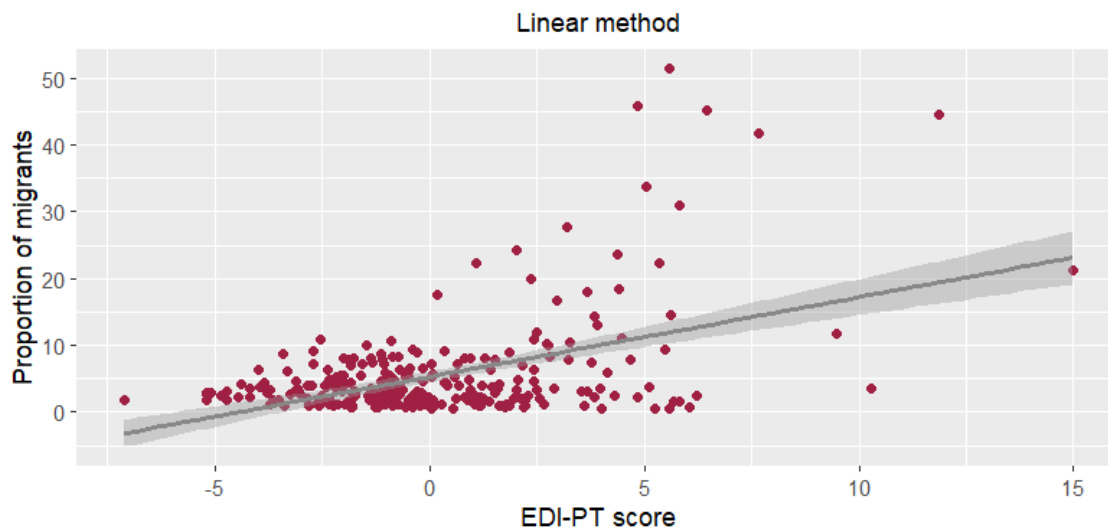

Figure S13. Scatterplot between the EDI-PT score and the proportion of migrants, linear method.

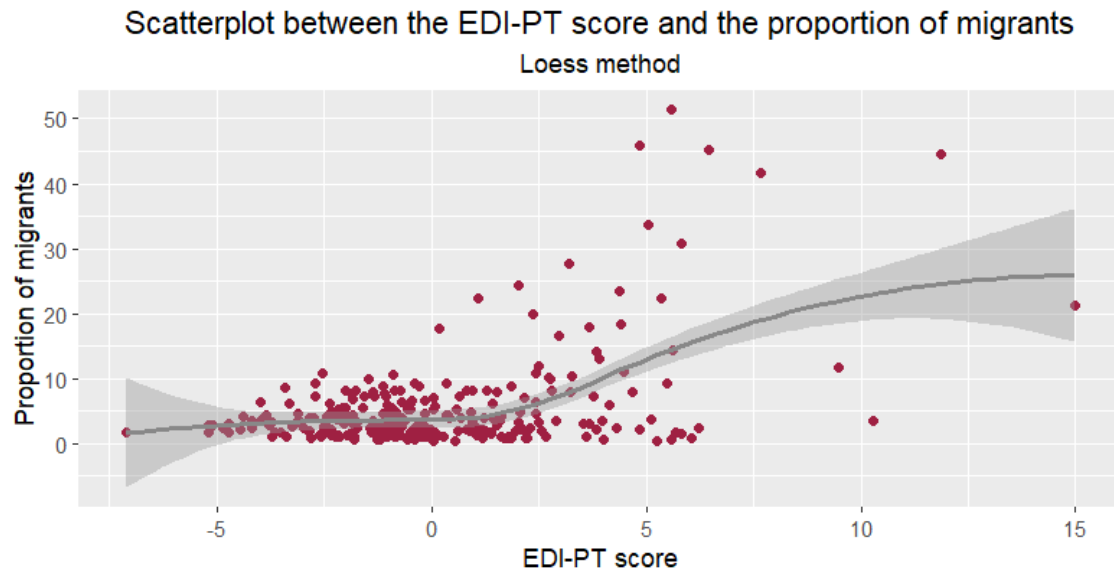

Figure S14. Scatterplot between the EDI-PT score and the proportion of migrants, loess method.

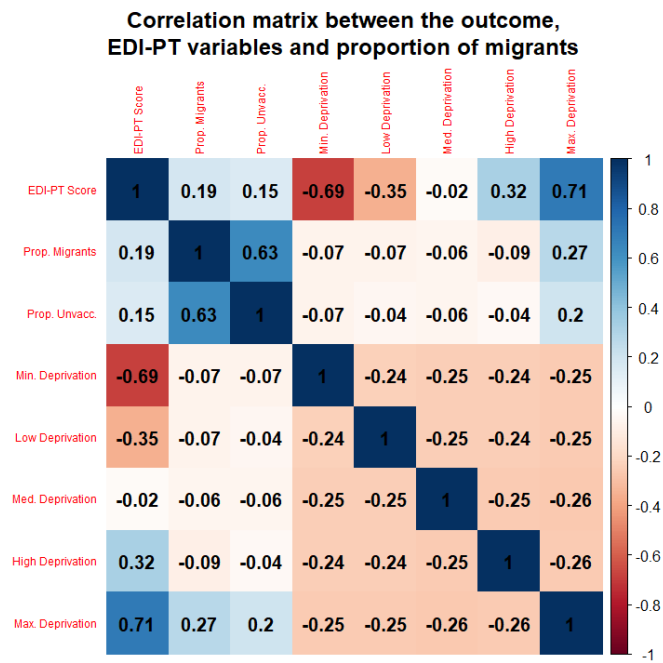

Figure S15. Correlation matrix between the proportion of unvaccinated individuals, EDI-PT variables, and proportion of migrants.

**Table S11. Generalized Variance Inflation Factor (GVIF) calculated on a linear model with the proportion of unvaccinated individuals as the dependent variable and the EDI-PT quintiles and the proportion of migrants as the independent variables.**

|                         | <b>GVIF</b> | <b>Df</b> | <b>GVIF<sup>1/(2*Df)</sup></b> |
|-------------------------|-------------|-----------|--------------------------------|
| <b>EDI-PT quintiles</b> | 1.25        | 4         | 1.03                           |
| <b>Prop. migrants</b>   | 1.25        | 1         | 1.12                           |

*Notes: GVIF – Generalized Variance Inflation Factor; Df – degrees of freedom*

**Table S12. Generalized Variance Inflation Factor (GVIF) calculated on a generalized linear model with a *Poisson* distribution with the proportion of unvaccinated individuals as the dependent variable and the EDI-PT quintiles and the proportion of migrants as the independent variables.**

|                         | <b>GVIF</b> | <b>Df</b> | <b>GVIF<sup>1/(2*Df)</sup></b> |
|-------------------------|-------------|-----------|--------------------------------|
| <b>EDI-PT quintiles</b> | 1.44        | 4         | 1.05                           |
| <b>Prop. migrants</b>   | 1.44        | 1         | 1.20                           |

*Notes: GVIF – Generalized Variance Inflation Factor; Df – degrees of freedom*

**Table S13. Generalized Variance Inflation Factor (GVIF) calculated on a generalized linear model with a *Poisson* distribution with the proportion of unvaccinated individuals as the dependent variable and the independent variables used on the multivariate model used in the paper (EDI-PT quintiles, proportion of migrants and 20-39 years age group).**

|                         | <b>GVIF</b> | <b>Df</b> | <b>GVIF<sup>1/(2*Df)</sup></b> |
|-------------------------|-------------|-----------|--------------------------------|
| <b>20-39 yrs</b>        | 1.67        | 1         | 1.29                           |
| <b>EDI-PT quintiles</b> | 1.57        | 4         | 1.06                           |
| <b>Prop. migrants</b>   | 1.96        | 1         | 1.40                           |

*Notes: GVIF – Generalized Variance Inflation Factor; Df – degrees of freedom*

## Equations from the models included in the paper

- (1) Null model without spatial component

$$\log(O) = \beta_0 + \log(E) + v$$

- (2) Null model with spatial component

$$\log(O) = \beta_0 + \log(E) + u + v$$

- (3) Univariate model – EDI-PT score

$$\log(O) = \beta_0 + \beta_1 * edis + \log(E) + u + v$$

- (4) Univariate model – EDI-PT quintiles

$$\log(O) = \beta_0 + \beta_1 * ediq + \log(E) + u + v$$

- (5) Univariate model – Sex

$$\log(O) = \beta_0 + \beta_1 * sexo + \log(E) + u + v$$

- (6) Univariate model – Age groups

5-14 years

$$\log(O) = \beta_0 + \beta_1 * ge1 + \log(E) + u + v, ge1 = \% pop\ 5 - 14$$

15-19 years

$$\log(O) = \beta_0 + \beta_1 * ge2 + \log(E) + u + v, ge2 = \% pop\ 15 - 19$$

20-39 years

$$\log(O) = \beta_0 + \beta_1 * ge3 + \log(E) + u + v, ge3 = \% pop\ 20 - 39$$

40-64 years

$$\log(O) = \beta_0 + \beta_1 * ge4 + \log(E) + u + v, ge4 = \% pop\ 40 - 64$$

65-79 years

$$\log(o) = \beta_0 + \beta_1 * ge5 + \log(e) + u + v, ge5 = \% pop\ 65 - 79$$

80+ years

$$\log(o) = \beta_0 + \beta_1 * ge6 + \log(e) + u + v, ge6 = \% pop\ 80 +$$

- (7) Univariate model – Proportion of migrants

$$\log(O) = \beta_0 + \beta_1 * pmid + \log(E) + u + v$$

- (8) Multivariate model

$$\log(O) = \beta_0 + \beta_1 * ediq + \beta_2 * ge6 + \beta_3 * pmid + \log(E) + u + v$$
